# Supplementary material
Source: publisher site journal article supplement (https://www.dovepress.com/article/581813)
Supplement: Supplementary file 1 [file 581813%20Supplementary%20Material.docx]

**supplementary1：**

The AECOPD and Non-AECOPD groups exhibited significant differences in age, body mass index (BMI), percentage of predicted forced expiratory volume in 1 second (FEV1%pred), FEV1/FVC ratio, VE-VCO2 slope, and carbon dioxide ventilation equivalent (EqCO2). Since our study outcome was a binary variable, we performed multivariate logistic regression analysis on the 6 variables showing differences (Table 1). Notably, as FEV1/FVC is a derivative parameter of FEV1, including both FEV1/FVC and FEV1%pred in the multivariate regression analysis could compromise model stability and validity. Therefore, FEV1/FVC was excluded from the final regression model. The logistic regression analysis revealed that the VE-VCO2 slope served as a significant predictor of AECOPD (Wald = 4.34, p = 0.037; OR = 1.32, 95% CI: 1.016–1.704). Specifically, each unit increase in VE-VCO2 slope was associated with a 32% elevation in AECOPD risk. Similarly, each incremental unit of age correlated with an 11% increase in AECOPD risk (95% CI: 1.003–1.221, p = 0.042).

**Supplementary Table 1**

| Variables | Odds Ratio, OR | 95% CI | p-value |
| --- | --- | --- | --- |
| Age | 1.11 | 1.003-1.221 | 0.042* |
| BMI | 0.93 | 0.763-1.128 | 0.453 |
| FEV1%pred | 0.94 | 0.890-0.998 | 0.044* |
| VE-VCO2 slope | 1.32 | 1.016-1.704 | 0.037* |
| EqCO2 | 0.99 | 0.823-1.180 | 0.876 |

**supplementary1：**Results of DeLong Test

Our findings identified VE-VCO2 slope, age, and FEV1%pred as risk factors for AECOPD. To evaluate their predictive capacity, we performed ROC curve analysis. Given that lower FEV1%pred values indicated stronger predictive power, we used their reciprocals for comparison with the other two indicators. Pairwise comparisons via the DeLong test among the three individual indicators and their composite index revealed no statistically significant differences in AUC values (Age vs. VE/VCO2 slope: Z = -0.132, p = 0.8952; Age vs. 1/FEV1%pred: Z = 0.597, p = 0.5502; VE/VCO2 slope vs. 1/FEV1%pred: Z = 0.695, p = 0.4872; Composite Index vs. Age: Z = 1.279, p = 0.203; Composite Index vs. VE/VCO2 slope: Z = 1.185, p = 0.2379; Composite Index vs. 1/FEV1%pred: Z = 1.914, p = 0.0578).
